# Supplementary material
Source: Elsevier journal article supplement (https://www.sciencedirect.com/science/article/pii/S0210569119300415)
Supplement: mmc1 [file S0210569119300415:mmc1.pdf]

## **MATERIAL ADICIONAL**

### **Definiciones de complicaciones y /o fracasos orgánicos en UCI:**

- Respiratorio:
  - ☐ Síndrome de distrés respiratorio agudo (SDRA) según criterios de Berlín:
    - Insuficiencia respiratoria no explicable por insuficiencia cardíaca o sobrecarga hídrica. Excluir edema hidrostático.
    - Inicio de los síntomas en la semana previa o deterioro de síntomas respiratorios existentes
    - Radiografía de tórax con opacidades bilaterales no explicable por derrame, atelectasia o nódulos.
    - $\text{PaO}_2/\text{FIO}_2 < 300$ , con  $\text{PEEP}/\text{CPAP} \geq 5$  mmHg
    -
  - ☐ Necesidad de ventilación mecánica invasiva (VMNI) al alta.
  - ☐ Destete prolongado: definido como “Pacientes que luego de 1 prueba de ventilación espontánea (PVE) inicial fallida requieren más de 3 PVE o un periodo mayor de 7 días para una PVE con posterior extubación con éxito”.
- Cardiovasculares:
  - ☐ uso de catecolaminas (necesidad de noradrenalina durante más de >6 horas).
  - ☐ aparición de arritmias (trastornos del ritmo persistentes con repercusión hemodinámica y/o necesidad de tratamiento).
  - ☐ síndrome coronario agudo: diagnosticado por clínica y confirmado por elevación de enzimas electrocardiograma y alteraciones en el ecocardiograma, independiente de la realización de cateterismo.
- Renales:
  - ☐ cifra de creatinina al ingreso (mg/dl) opara clasificar según estadios AKIN.
  - ☐ necesidad de terapia renal sustitutiva.
- Hematológicas:
  - ☐ si desarrolla trombosis (independientemente de la localización) diagnosticado mediante ecodoppler.
  - ☐ aparición de sangrado gastrointestinal y/o cerebral.
- Delirio/ síndrome confusional: definido como “inicio brusco de un conjunto de cambios globales transitorios, y de alteraciones en la atención, conocimiento, actividad psicomotora, estado de conciencia y/o ciclo sueño/vigilia” que presenta el paciente durante su ingreso.
- Debilidad adquirida del enfermo crítico: cuadro de cuadriparesia usualmente flácida y simétrica adquirida en UCI, asociado a la reducción y/o ausencia de reflejos tendinosos profundos, con conservación de musculatura facial.
- Infección de cualquier localización o sepsis según los siguientes criterios (JAMA 2016) e indicando el origen de la infección:
  - ☐ Sepsis: Ante una infección con 2-3 puntos en el qSOFA (Quick SOFA criteria) definido por 1) Frecuencia respiratoria  $\geq 22$  rpm/min, 2) alteración consciencia

con GSC  $\leq 13$ , 3) Presión arterial sistólica  $\leq 100$  mmHg) o aumento de 2 puntos en escala de SOFA.

- ☐ Shock séptico: Sepsis con persistencia de lactato  $> 2$  mmol/L a pesar de fluidoterapia adecuada y necesidad de soporte vasoactivo.

**Tabla 1S- Comparación de los motivos de ingreso entre pacientes frágiles y no frágiles**

| N(%)                            |                | Frágil<br>(Frail Scale $\geq 3$ )<br>N=46 | No frágil<br>(Frail Scale 0-2)<br>N=86 |
|---------------------------------|----------------|-------------------------------------------|----------------------------------------|
| Coma origen neurológico         |                | 3 (6,5%)                                  | 10 (11,6%)                             |
| Encefalopatía tóxico-metabólica |                | 0                                         | 2 (2,3%)                               |
| Reagudización EPOC              |                | 4 (8,7%)                                  | 0                                      |
| Insuficiencia cardiaca          |                | 5 (10,9%)                                 | 5 (5,8%)                               |
| Parada cardiorrespiratoria      |                | 0                                         | 1 (1,2%)                               |
| Síndrome coronario agudo        |                | 6 (13%)                                   | 5 (5,8%)                               |
| Shock                           |                | 3 (6,5%)                                  | 4 (4,7%)                               |
| Cirugía urgente                 |                | 4 (8,7%)                                  | 9 (10,5%)                              |
| Cirugía programada              |                | 2 (4,3%)                                  | 11 (12,8%)                             |
| Traumatismo                     |                | 1 (2,2%)                                  | 1 (1,2%)                               |
| Traumatismo craneoencefálico    |                | 0                                         | 2 (2,3%)                               |
| Fracaso renal reagudizado       |                | 3 (6,5%)                                  | 1 (1,2%)                               |
| Quemaduras                      |                | 1 (2,2%)                                  | 3 (3,5%)                               |
| Sepsis                          | Neurológico    | 0                                         | 1 (1,2%)                               |
|                                 | Pulmonar       | 2 (4,3%)                                  | 3 (3,5%)                               |
|                                 | Abdominal      | 2 (4,3%)                                  | 12 (14%)                               |
|                                 | Urológico      | 3 (6,5%)                                  | 9 (10,5%)                              |
|                                 | Partes blandas | 3 (6,5%)                                  | 0                                      |
| Otros                           |                | 4 (6,7%)                                  | 7 (8,1%)                               |
